# Supplementary material for: Fabrication of 3D high aspect ratio PDMS microfluidic networks with a hybrid stamp
Source: Royal Society of Chemistry journal article supplement (doi:10.1039/c4lc01211a), 2015-01-01
Supplement: c4lc01211a1.pdf [file c4lc01211a1.pdf]

## Supplemental material

**Table 1** compares various 3D microfluidics structure fabrication methods, which are referred in this paper to provide direct comparison between each one. This table includes the information of lateral resolution, layer thickness resolution, HAR, vias, interlayer deformability, and ability to bond structures between hard substrates of these different approaches.

**Video 1** shows the tunable channel deformation when different pneumatic pressure values were applied to the side channel. The sidewalls of the microchannel can fully touch at pressure over 60psi.

**Video 2** shows the focused single-stream fluorescent real-time video of GFP-E. Coli flowing at an average velocity about 14 cm/s. The medium conductivity is 30 mS/m. An a.c. signal (5MHz, 56.6V peak-to-peak) is applied, and the sidewall gap is deformed down to around 3  $\mu\text{m}$  when 60psi is applied to the side channels.

| Method                                                | Lateral Resolution | Vertical Resolution | HAR   | Vias | Interlayer Deformable Structure | Bonded between Hard Substrates |
|-------------------------------------------------------|--------------------|---------------------|-------|------|---------------------------------|--------------------------------|
| Hybrid Stamp (this paper)                             | 6 $\mu\text{m}$    | 4 $\mu\text{m}$     | 5     | Yes  | Yes                             | Yes                            |
| Polymer-Film Stamp [14]                               | 150 $\mu\text{m}$  | 100 $\mu\text{m}$   | 1     | Yes  | No                              | No                             |
| Glass Hard Stamp [13]                                 | 30 $\mu\text{m}$   | 160 $\mu\text{m}$   | 0.33  | Yes  | No                              | No                             |
| PDMS Curing Inhibiting Layer on Glass Hard Stamp [25] | 100 $\mu\text{m}$  | 60 $\mu\text{m}$    | 0.33  | Yes  | No                              | No                             |
| PDMS Curing Inhibiting Layer Polymer-Film Stamp [26]  | 100 $\mu\text{m}$  | 50 $\mu\text{m}$    | 0.5   | Yes  | Yes                             | No                             |
| Regular PDMS Stamp [24]                               | 100 $\mu\text{m}$  | 50 $\mu\text{m}$    | 0.5   | Yes  | No                              | No                             |
| Laser Cutting on Bulk PDMS Support [27]               | 800 $\mu\text{m}$  | 36 $\mu\text{m}$    | 0.045 | Yes  | No                              | Yes                            |
| Thermal Plastic Hot Embossing [15]                    | 30 $\mu\text{m}$   | 90 $\mu\text{m}$    | 3     | Yes  | No                              | No                             |
| PDMS Spin                                             | 25 $\mu\text{m}$   | 36 $\mu\text{m}$    | 1.44  | Yes  | No                              | No                             |

|                                                            |       |      |      |     |     |     |
|------------------------------------------------------------|-------|------|------|-----|-----|-----|
| Coating [22]                                               |       |      |      |     |     |     |
| Air-Blowing [23]                                           | 130μm | 70μm | 1.86 | Yes | No  | Yes |
| Multi-Layer Soft Lithography [21]                          | 50μm  | 9μm  | 0.18 | No  | Yes | No  |
| Multilayer Photoresist Direct Patterning and Stacking [16] | 200μm | 20μm | 0.1  | Yes | No  | Yes |

Table 1 compares various 3D microfluidics structure fabrication methods, which are referred in this paper to provide direct comparison between each one.
